# Supplementary material for: Willingness to Know the Cause of Death and Hypothetical Acceptability of the Minimally Invasive Autopsy in Six Diverse African and Asian Settings: A Mixed Methods Socio-Behavioural Study
Source: PLOS journal article supplement (doi:10.1371/journal.pmed.1002172), 2016-11-22
Supplement: S3 (10.1371/journal.pmed.1002172.s003) [file journal.pmed.1002172.s003]

**S2 Table**

**Hypothetical acceptability of the minimally invasive autopsy for a deceased relative, according to site, target group, and interviewed participants' socio-demographic characteristics.**

|                                     | <b>Yes</b>           | <b>Under certain circumstances</b> | <b>No</b>            | <b>Do not know</b>   | <b>Did not answer</b> | <b>Not asked</b>     |
|-------------------------------------|----------------------|------------------------------------|----------------------|----------------------|-----------------------|----------------------|
|                                     | <b>Percent (n/N)</b> | <b>Percent (n/N)</b>               | <b>Percent (n/N)</b> | <b>Percent (n/N)</b> | <b>Percent (n/N)</b>  | <b>Percent (n/N)</b> |
| <b>By site</b>                      |                      |                                    |                      |                      |                       |                      |
| <b>Lambaréné, Gabon</b>             | 65.5 (55/84)         | 23.8 (20/84)                       | 9.5 (8/84)           | 1.2 (1/84)           | 0.0 (0/84)            | 0.0 (0/84)           |
| <b>Kisumu, Kenya</b>                | 75.2 (97/129)        | 6.2 (8/129)                        | 8.5 (11/129)         | 0.8 (1/129)          | 0.8 (1/129)           | 8.5 (11/129)         |
| <b>Bamako, Mali</b>                 | 89.0 (81/91)         | 5.5 (5/91)                         | 2.2 (2/91)           | 3.3 (3/91)           | 0.0 (0/91)            | 0.0 (0/91)           |
| <b>Manhiça, Mozambique</b>          | 77.8 (63/81)         | 6.2 (5/81)                         | 7.4 (6/81)           | 3.7 (3/81)           | 4.9 (4/81)            | 0.0 (0/81)           |
| <b>Maputo, Mozambique</b>           | 76.0 (19/25)         | 16.0 (4/25)                        | 0.0 (0/25)           | 0.0 (0/25)           | 8.0 (2/25)            | 0.0 (0/25)           |
| <b>Karachi, Pakistan</b>            | 54.3 (51/94)         | 28.7 (27/94)                       | 14.9 (14/94)         | 2.1 (2/94)           | 0.0 (0/94)            | 0.0 (0/94)           |
| <b>TOTAL</b>                        | 72.6 (366/504)       | 13.7 (69/504)                      | 8.1 (41/504)         | 2.0 (10/505)         | 1.4 (7/504)           | 2.2 (11/504)         |
| <b>By target group</b>              |                      |                                    |                      |                      |                       |                      |
| <b>Key Informants</b>               | 65.2 (88/135)        | 16.3 (22/135)                      | 8.9 (12/135)         | 1.5 (2/135)          | 1.5 (2/135)           | 6.7 (9/135)          |
| <b>Health providers</b>             | 81.1 (142/175)       | 10.3 (18/175)                      | 4.6 (8/175)          | 1.1 (2/175)          | 1.7 (3/175)           | 1.1 (2/175)          |
| <b>Relatives of deceased people</b> | 70.1 (136/194)       | 14.9 (29/194)                      | 10.8 (21/194)        | 3.1 (6/194)          | 1.0 (2/194)           | 0.0 (0/194)          |
| <b>By gender</b>                    |                      |                                    |                      |                      |                       |                      |
| <b>Male</b>                         | 70.9 (224/316)       | 15.5 (49/316)                      | 7.3 (23/316)         | 1.3 (4/316)          | 1.6 (5/316)           | 3.5 (11/316)         |
| <b>Female</b>                       | 75.5 (142/188)       | 10.6 (20/188)                      | 9.6 (18/188)         | 3.2 (6/188)          | 1.1 (2/188)           | 0.0 (0/188)          |
| <b>By age</b>                       |                      |                                    |                      |                      |                       |                      |
| <b>18-29 y</b>                      | 78.3 (65/83)         | 13.3 (11/83)                       | 7.2 (6/83)           | 0.0 (0/83)           | 1.2 (1/83)            | 0.0 (0/83)           |
| <b>30-49 y</b>                      | 72.0 (170/236)       | 15.3 (36/236)                      | 7.2 (17/236)         | 1.7 (4/236)          | 1.3 (3/236)           | 2.5 (6/236)          |
| <b>&gt;50 y</b>                     | 70.8 (131/185)       | 11.9 (22/185)                      | 9.7 (18/185)         | 3.2 (6/185)          | 1.6 (3/185)           | 2.7 (5/185)          |

| <b>By education</b>                         |                |               |              |             |             |              |
|---------------------------------------------|----------------|---------------|--------------|-------------|-------------|--------------|
| <b>No schooling</b>                         | 64.4 (38/59)   | 10.2 (6/59)   | 18.6 (11/59) | 3.4 (2/59)  | 3.4 (2/59)  | 0.0 (0/59)   |
| <b>Primary</b>                              | 74.4 (99/133)  | 6.8 (9/133)   | 9.0 (12/133) | 3.8 (5/133) | 2.3 (3/133) | 3.8 (5/133)  |
| <b>Secondary</b>                            | 64.8 (59/91)   | 25.3 (23/91)  | 6.6 (6/91)   | 1.1 (1/91)  | 0.0 (0/91)  | 2.2 (2/91)   |
| <b>Quranic School</b>                       | 86.4 (19/22)   | 9.1 (2/22)    | 0.0 (0/22)   | 4.5 (1/22)  | 0.0 (0/22)  | 0.0 (0/22)   |
| <b>Professional Training – Health</b>       | 80.9 (51/63)   | 11.1 (7/63)   | 7.9 (5/63)   | 0.0 (0/63)  | 0.0 (0/63)  | 0.0 (0/63)   |
| <b>Professional Training – Other</b>        | 66.6 (10/15)   | 13.3 (2/15)   | 6.6 (1/15)   | 0.0 (0/15)  | 0.0 (0/15)  | 13.3 (2/15)  |
| <b>University or higher - Health</b>        | 88.4 (61/69)   | 5.8 (4/69)    | 2.8 (2/69)   | 0.0 (0/69)  | 2.8 (2/69)  | 0.0 (0/69)   |
| <b>University or higher - Other</b>         | 55.7 (29/52)   | 30.7 (16/52)  | 7.7 (4/52)   | 2.0 (1/52)  | 0.0 (0/52)  | 2.0 (1/52)   |
| <b>By occupation</b>                        |                |               |              |             |             |              |
| <b>Regular income</b>                       | 66.7 (64/96)   | 18.8 (18/96)  | 6.3 (6/96)   | 1.0 (1/96)  | 2.1 (2/96)  | 5.2 (5/96)   |
| <b>Irregular income<sup>1</sup></b>         | 74.0 (74/100)  | 11.0 (11/100) | 8.0 (8/100)  | 3.0 (3/100) | 1.0 (1/100) | 3.0 (3/100)  |
| <b>No own income<sup>2</sup></b>            | 63.6 (63/99)   | 17.2 (17/99)  | 15.2 (15/99) | 3.0 (3/99)  | 1.0 (1/99)  | 0.0 (0/99)   |
| <b>Formal health professional</b>           | 81.9 (127/155) | 10.3 (16/155) | 4.5 (7/155)  | 0.6 (1/155) | 1.9 (3/155) | 0.6 (1/155)  |
| <b>Informal/Traditional health provider</b> | 75.0 (21/28)   | 10.7 (3/28)   | 7.1 (2/28)   | 3.6 (1/28)  | 0.0 (0/28)  | 3.6 (1/28)   |
| <b>Clergy</b>                               | 65.4 (17/26)   | 15.4 (4/26)   | 11.5 (3/26)  | 3.8 (1/26)  | 0.0 (0/26)  | 3.8 (1/26)   |
| <b>By religion</b>                          |                |               |              |             |             |              |
| <b>Christian<sup>3</sup></b>                | 75.4 (211/280) | 10.4 (29/280) | 6.8 (19/280) | 1.8 (5/280) | 1.8 (5/280) | 3.9 (11/280) |
| <b>Muslim</b>                               | 70.4 (133/189) | 17.5 (33/189) | 9.5 (18/189) | 2.6 (5/189) | 0.0 (0/189) | 0.0 (0/189)  |
| <b>Animist</b>                              | 69.0 (20/29)   | 13.8 (4/29)   | 13.8 (4/29)  | 0.0 (0/29)  | 3.4 (1/29)  | 0.0 (0/29)   |
| <b>Atheist</b>                              | 50.0 (1/2)     | 0.0 (0/2)     | 0.0 (0/2)    | 0.0 (0/2)   | 50.0 (1/2)  | 0.0 (0/2)    |
| <b>Not known</b>                            | 25.0 (1/4)     | 75.0 (3/4)    | 0.0 (0/4)    | 0.0 (0/4)   | 0.0 (0/4)   | 0.0 (0/4)    |

<sup>1</sup>Individuals with income from small business, subsistence farming, fishery and livestock, or casual labour.

<sup>2</sup>Individuals who are students; housewives, unemployed, or retired

<sup>3</sup>Catholic, Protestant or Evangelist, or Christian undetermined.
